# Supplementary material for: Soil microbial communities vary in composition and functional strategy across soil aggregate size class regardless of tillage
Source: Oxford University Press journal article supplement (doi:10.1525/elementa.2022.00023), 2022-01-01
Supplement: elementa_supplemental_materials_final.docx [file elementa_supplemental_materials_final.docx]

Supplemental material

Soil microbial communities vary in composition and functional strategy across soil aggregate size class regardless of tillage

Lukas T. Bernhardt1*, Richard G. Smith1, A. Stuart Grandy1, Jessica E. Mackay1, Nicholas D. Warren1, Kevin M. Geyer2, Jessica G. Ernakovich1

1Department of Natural Resources and the Environment, University of New Hampshire, Durham, NH, USA

2Young Harris College, Young Harris, GA, USA

*** Correspondence:**

Lukas T. Bernhardt

Lukas.Bernhardt@unh.edu


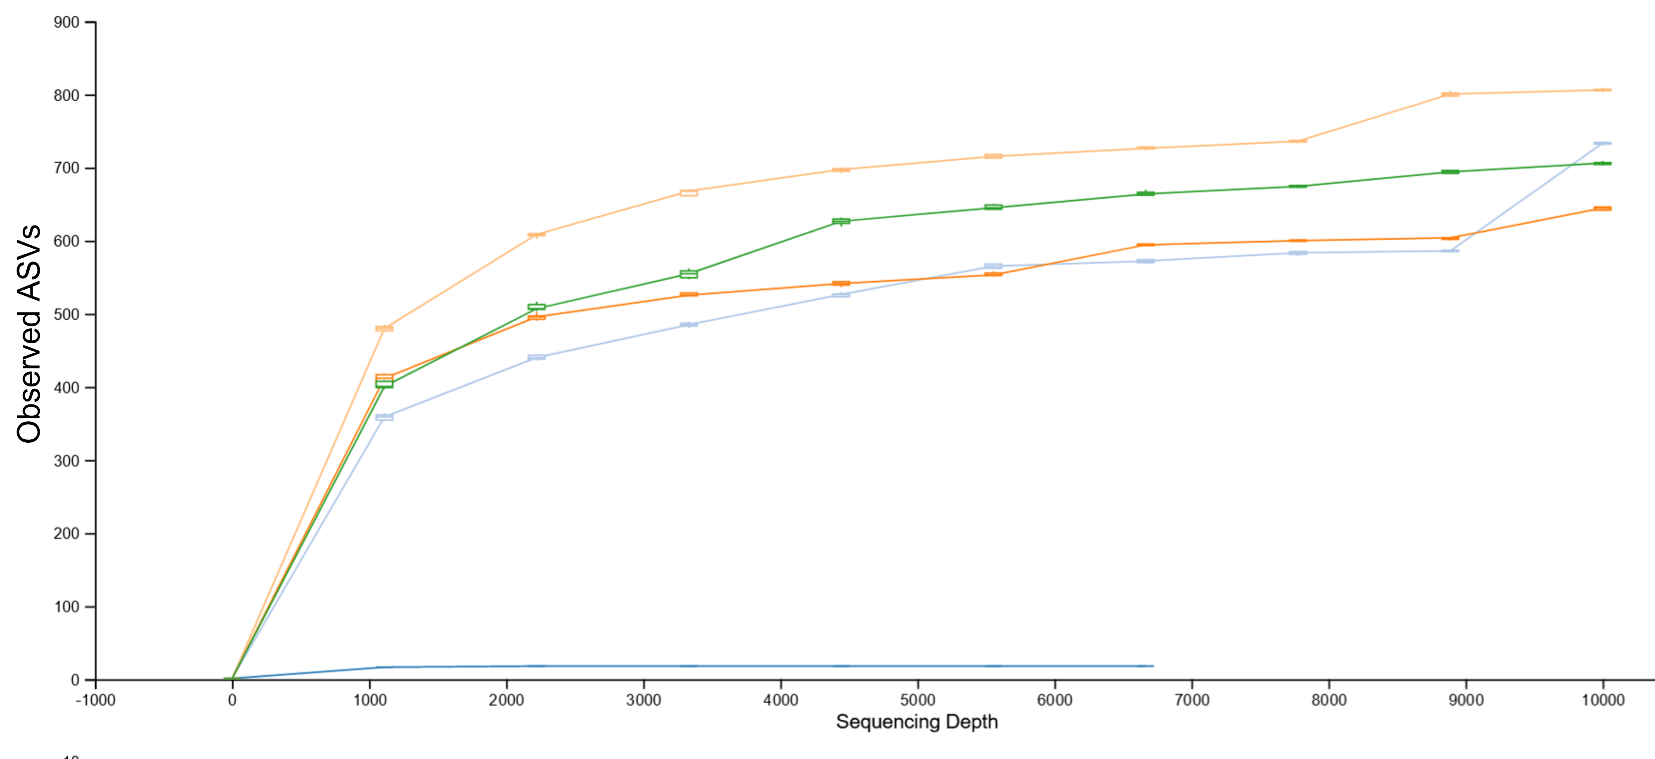


**Figure S1: Rarefaction curve showing amplicon sequence variants (ASVs) observed at various sequencing depths**

The colors represent aggregate size classes. Light blue- 1 mm- 2 mm; Dark orange 0.25 mm- 1 mm; Light orange <0.25 mm; Dark blue extraction blanks. The boxes along each curve are the median and 1st and 3rd quartiles of the data for observed ASVs at various sequencing depths.


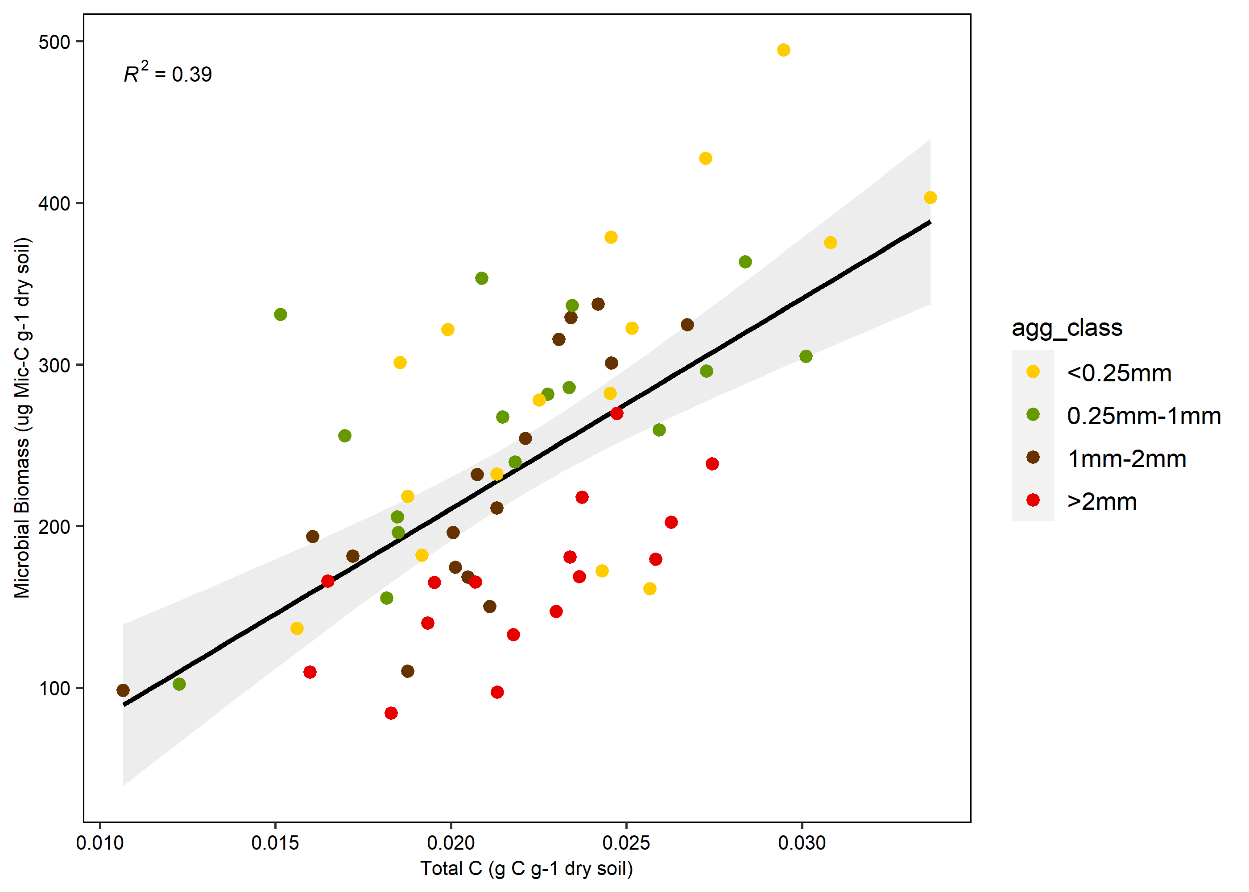


**Figure S2: Linear regression of microbial biomass** **vs total carbon**

Biomass was calculated via glucose respiration

with the equation from Anderson and Domsch, 1978 and plotted against total carbon. Linear modeling determined that the variables were significantly correlated p < 0.001.


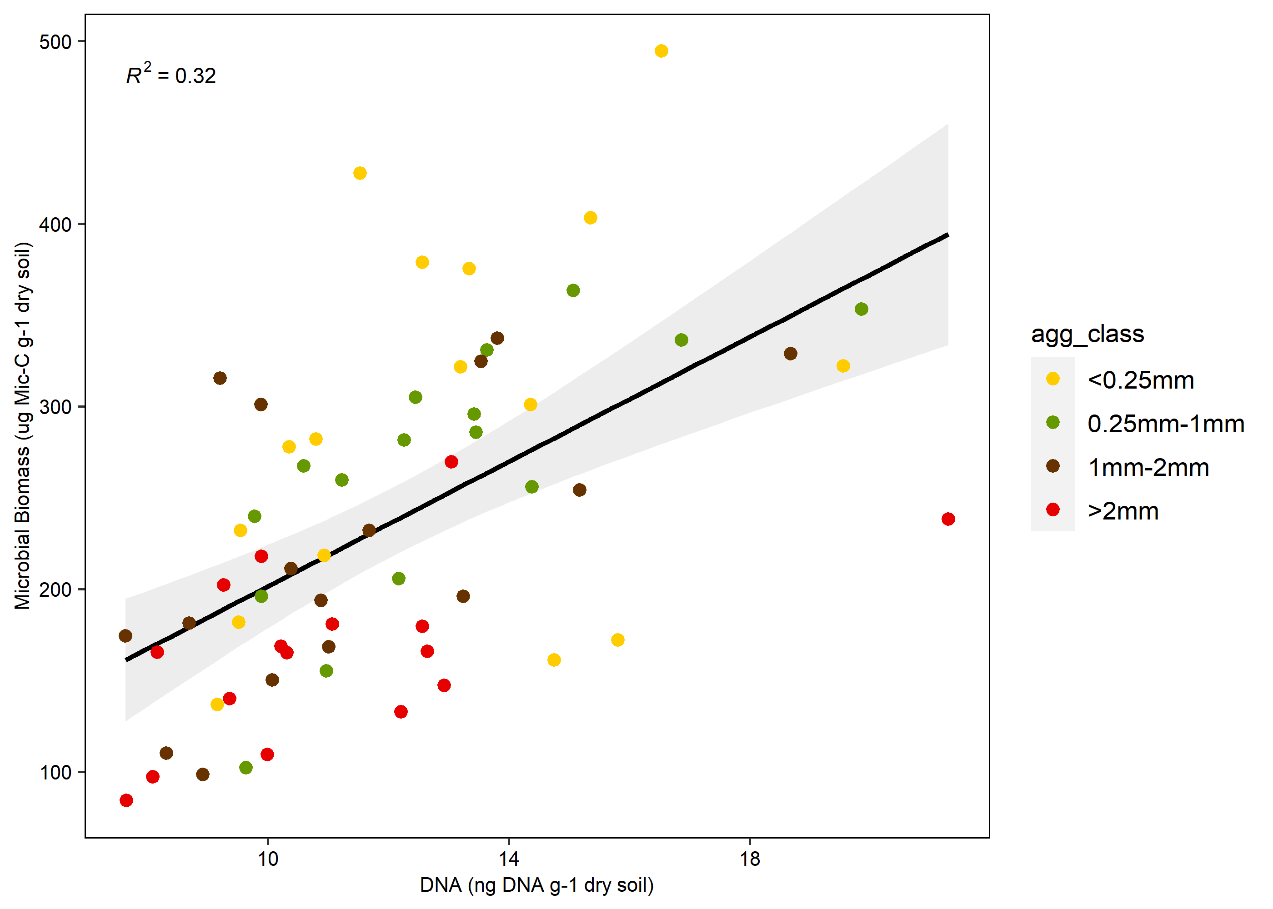


**Figure S3: Linear regression of microbial biomass against soil DNA measured**

Recovered DNA calculated as ng DNA per g dry soil-1

. Biomass calculated via glucose respiration with the equation from Anderson and Domsch, 1978. Linear modeling determined that the variables were significantly correlated P<0.001.


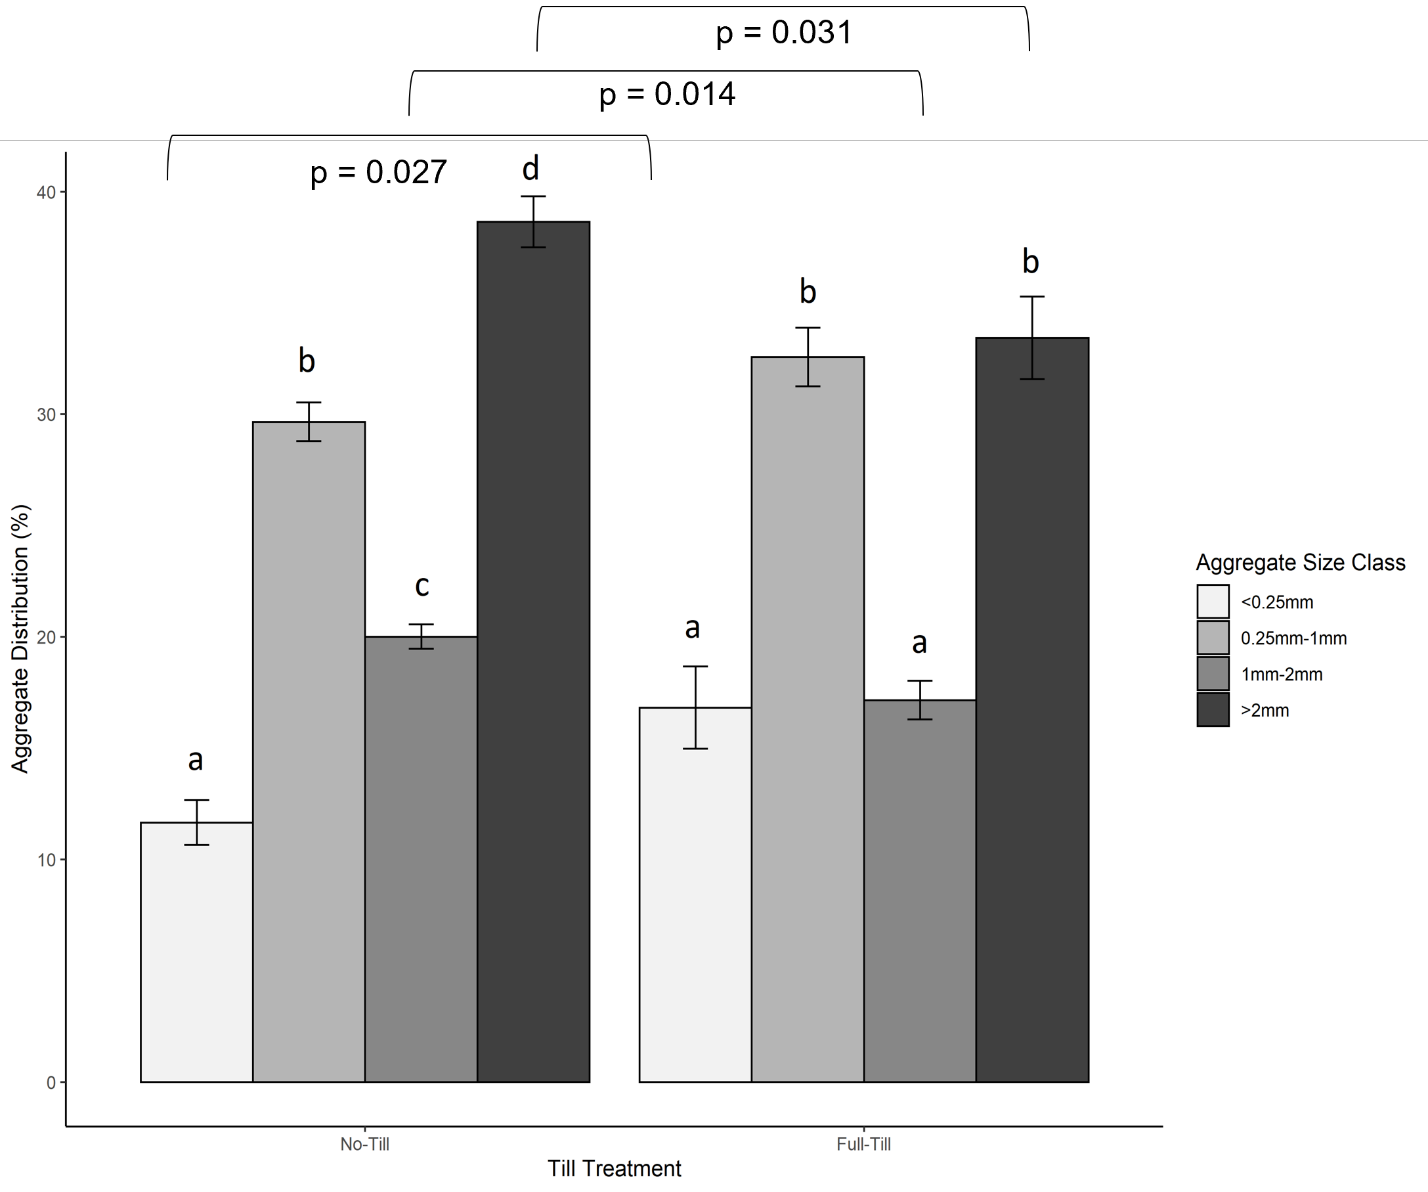


**Figure S4:** **Aggregate size class distribution in no-till (left) and full-till (right) treatments**

Lower case letters denote significance within tillage treatment. p-values denote significant differences between aggregates within the same size class when comparing no-till and full-till. There was no difference between the 0.25- 1mm aggregate size classes between no-till and full-till. Within full-till sites the <0.25 mm size class differed from both the 0.25-1 mm and >2 mm size class (p < 0.001) and the 1-2 mm size class differed from the 0.25- 1 and >2 mm size class (p <0.001). Within no-till sites, every aggregate size class differed significantly from one another (p < 0.001 for all comparrisons). p-values and significance within tillage treatment determined using two-way ANOVA and Tukey HSD post-hoc test.

**Table S1: Community weighted NSTI values for samples included in Picrust2 analysis**

Lower NSTI values indicate samples with good reference representation. NSTI values between 0.06 < NSTI < 0.15 are considered reliable values. Any OTU’s with NSTI > 2 standard deviations from mean were discarded from analysis. After quality control, 8149 OTU’s were retained.

| **sample** | **weighted_NSTI** |
| --- | --- |
| LB_16S_1 | 0.081055 |
| LB_16S_2 | 0.093029 |
| LB_16S_3 | 0.085708 |
| LB_16S_4 | 0.096764 |
| LB_16S_5 | 0.110303 |
| LB_16S_6 | 0.102728 |
| LB_16S_7 | 0.10931 |
| LB_16S_8 | 0.095926 |
| LB_16S_10 | 0.112773 |
| LB_16S_11 | 0.106172 |
| LB_16S_12 | 0.097453 |
| LB_16S_14 | 0.105701 |
| LB_16S_15 | 0.109831 |
| LB_16S_16 | 0.099343 |
| LB_16S_18 | 0.094098 |
| LB_16S_19 | 0.094662 |
| LB_16S_20 | 0.094207 |
| LB_16S_21 | 0.118401 |
| LB_16S_22 | 0.101297 |
| LB_16S_23 | 0.107071 |
| LB_16S_24 | 0.094269 |
| LB_16S_25 | 0.10373 |
| LB_16S_26 | 0.098978 |
| LB_16S_27 | 0.112357 |
| LB_16S_28 | 0.101437 |
| LB_16S_29 | 0.110311 |
| LB_16S_30 | 0.103154 |
| LB_16S_31 | 0.104774 |
| LB_16S_32 | 0.067374 |
| LB_16S_34 | 0.098465 |
| LB_16S_35 | 0.101493 |
| LB_16S_36 | 0.087087 |
| LB_16S_37 | 0.090882 |
| LB_16S_38 | 0.089149 |
| LB_16S_39 | 0.101833 |
| LB_16S_40 | 0.084779 |
| LB_16S_41 | 0.112045 |
| LB_16S_42 | 0.096271 |
| LB_16S_43 | 0.113692 |
| LB_16S_44 | 0.122051 |
| LB_16S_45 | 0.100425 |
| LB_16S_46 | 0.100742 |
| LB_16S_47 | 0.110877 |
| LB_16S_48 | 0.094318 |
| LB_16S_49 | 0.115414 |
| LB_16S_50 | 0.093069 |
| LB_16S_51 | 0.097761 |
| LB_16S_53 | 0.09217 |
| LB_16S_54 | 0.1118 |
| LB_16S_55 | 0.107273 |
| LB_16S_57 | 0.104035 |
| LB_16S_58 | 0.099947 |
| LB_16S_59 | 0.106719 |
| LB_16S_60 | 0.105085 |
| LB_16S_61 | 0.097653 |
| LB_16S_62 | 0.101817 |
| LB_16S_63 | 0.103257 |
| LB_16S_64 | 0.106076 |

**Table S2:** **Soil and microbial community properties for no-till and full-till aggregate size classes.**

Mean and standard error values are reported. Bold letters denote significant differences between aggregate size classes within tillage treatment analyzed by ANOVA and Tukey HSD post hoc test.

| **Soil properties** | **<0.25 mm** | | | | **0.25-1 mm** | | | | **1- 2 mm** | | | | **>2 mm** | | | |
| --- | --- | --- | --- | --- | --- | --- | --- | --- | --- | --- | --- | --- | --- | --- | --- | --- |
| **NT** | | **FT** | | **NT** | | **FT** | | **NT** | | **FT** | | **NT** | | **FT** | |
|  | Mean | + SE | Mean | + SE | Mean | + SE | Mean | + SE | Mean | + SE | Mean | + SE | Mean | + SE | Mean | + SE |
| pH | 6.52 | 0.11 | 6.28 | 0.13 | 6.63 | 0.16 | 6.37 | 0.13 | 6.93 | 0.28 | 6.44 | 0.11 | 6.46 | 0.095 | 6.3 | 0.11 |
| EC | 32.72 | 2.89 | 21.25 | 2.17 | 31.07 | 3.41 | 18.29 | 2.15 | 26.04 | 2.6 | 18.97 | 1.86 | 29.97 | 2.94 | 20.18 | 2.67 |
| Total Ca | 0.027 | 1.60E-03 | 0.021 | 1.10E-03 | 0.023 | 1.90E-03 | 0.02 | 1.40E-03 | 0.022 | 1.10E-03 | 0.019 | 1.40E-03 | 0.024 | 1.20E-03 | 0.02 | 8.00E-03 |
| Total Nb | 0.003 | 1.4e-04**a** | 0.0019 | 8.77E-05 | 0.0021 | 1.4e-04**b** | 0.0018 | 1.02E-04 | 0.002 | 6.7e-05**b** | 0.0017 | 1.13E-04 | 0.0022 | 8.8e-05**ab** | 0.0018 | 6.68E-05 |
| C:N | 10.53 | 0.13 | 10.48 | 0.12 | 10.9 | 0.23 | 10.69 | 0.21 | 10.85 | 0.22 | 10.95 | 0.19 | 10.87 | 0.2 | 10.68 | 0.12 |
| Mic. Biomassc | 332.2 | 41.9**a** | 253.67 | 27.44**a** | 315.8 | 12.9**a** | 213.41 | 21.76 **a** | 274.64 | 20.65**ab** | 172.46 | 21.97**ab** | 200.17 | 14.25**b** | 132.81 | 11.65**b** |
| WHC | 0.73 | 0.015**a** | 0.67 | 0.018**a** | 0.65 | 0.018**b** | 0.57 | 0.018**ab** | 0.58 | 0.02**bc** | 0.51 | 0.019**bc** | 0.52 | 0.02**c** | 0.46 | 0.02**c** |
| ***Enzyme Activity (*µ*mol h-1 g dry soil -1)*** | | | | | | | | | | | | | | | | |
| PHOS | 1003 | 318.71 | 734.04 | 79.50**a** | 813.86 | 168.85 | 511.45 | 113.51**ab** | 753.41 | 140.2 | 676.64 | 98.16**ab** | 613.56 | 81.87 | 374.45 | 31.91**b** |
| BG | 401.2 | 76.83 | 228.09 | 33.09 | 370.17 | 47.28 | 199.76 | 32.6 | 322.29 | 43.02 | 249.5 | 41.24 | 365.67 | 48.41 | 151.99 | 13.67 |
| NAG | 98.88 | 15.28 | 57.73 | 8.88a | 94.94 | 8.302 | 54.63 | 7.66 | 84.01 | 11.11 | 65.46 | 9.64 | 101.12 | 5.28 | 48.57 | 7.61 |
| LAP | 88.67 | 14.94 | 76.64 | 9.83 | 88.86 | 13 | 56.09 | 13.16 | 72.52 | 7.99 | 70.11 | 15.21 | 72.04 | 7.89 | 42.43 | 5.12 |
| CBH | 92.76 | 16.77 | 40.66 | 5.93 | 85.94 | 11.01 | 36.61 | 6.68 | 73.97 | 10.19 | 41.64 | 7.7 | 79.63 | 5.98 | 31.64 | 6.45 |
| ***Multiple substrate induced respiration (µg CO2-C g-1 dry soil h-1)*** | | | | | | | | | | | | | | | | |
| Arginine | 1.25 | 0.42 | 0.97 | 0.22 | 1.07 | 0.15 | 0.62 | 0.17 | 1.28 | 0.21 | 0.82 | 0.16 | 0.89 | 0.15 | 0.67 | 0.15 |
| Lysine | 0.40 | 0.15 | 0.23 | 0.08 | 0.20 | 0.05 | 0.17 | 0.07 | 0.47 | 0.07 | 0.25 | 0.06 | 0.34 | 0.07 | 0.24 | 0.08 |
| Citric Acid | 1.81 | 0.33 | 1.13 | 0.27 | 2.10 | 0.15 | 1.12 | 0.24 | 2.72 | 0.11 | 1.81 | 0.22 | 2.30 | 0.3 | 1.54 | 0.23 |
| Malic Acid | 1.97 | 0.56 | 1.25 | 0.26 | 1.85 | 0.21 | 0.92 | 0.17 | 1.33 | 0.14 | 0.74 | 0.15 | 1.34 | 0.25 | 1.01 | 0.19 |
| Trehalose | 1.69 | 0.39 | 1.09 | 0.23 | 1.63 | 0.15 | 0.88 | 0.14 | 1.44 | 0.12 | 0.78 | 0.18 | 1.31 | 0.2 | 1.09 | 0.16 |
| Arabinose | 0.91 | 0.21 | 0.65 | 0.15 | 1.19 | 0.18 | 0.54 | 0.13 | 1.47 | 0.11 | 0.91 | 0.15 | 1.30 | 0.16 | 0.86 | 0.12 |
| Glucose | 2.30 | 0.5 | 1.78 | 0.29**a** | 2.44 | 0.17 | 1.48 | 0.19**ab** | 2.30 | 0.18 | 1.19 | 0.26**ab** | 1.44 | 0.23 | 0.23 | 0.12**b** |
| Total MSIR | 10.34 | 2.44 | 7.1 | 1.32 | 10.49 | 0.81 | 5.73 | 0.86 | 11.03 | 0.77 | 6.5 | 0.11 | 8.94 | 1.24 | 6.22 | 0.94 |
| Basal Resp.d | 1.76 | 0.19 | 1.32 | 0.19 | 1.42 | 0.13 | 1.12 | 0.14 | 1.05 | 0.11 | 0.92 | 0.11 | 1.00 | 0.09 | 0.79 | 0.08 |

a Measured via elemental analysis (g C g-1 dry soil)

b Measured via elemental analysis (g N g-1 dry soil)

c Microbial biomass calculated via method from Anderson and Domsch, 1978 (µg MIC- C g-1 dry soil h-1)

d Basal respiration calculated from water induced respiration during MSIR (µg CO2-C g-1 dry soil h-1

**Table S3:** **Bacterial indicator species in aggregate size classes**

.

Indicator species analysis was conducted using the “indicspecies” package in R. There were 2 amplicon sequence variants (ASV) identified as indicators of the <0.25 mm community and 0.25- 1mm communities. There were 5 ASVs identified as indicators of the >2 mm aggregate bacterial community. ASVs with p- values less than 0.05 were considered significant indicators.

| **Aggregate Size class** | **Phylum** | **Class** | **Order** | **Family** | **p value** |  |
| --- | --- | --- | --- | --- | --- | --- |
| <0.25 mm | Actinobacteria | Actinobacteria | Actinomycetales | Nocardioidaceae | 0.001 | *** |
|  | Actinobacteria | Actinobacteria | Actinomycetales | Sporichthyacaea | 0.007 | ** |
| 0.25- 1 mm | Verrucomicrobia | - | - | - | 0.016 | * |
|  | Actinobacteria | Actinobacteria | Actinomycetales | Actinosynnemataceae | 0.048 | * |
| >2 mm | Chloroflexi | Anaerolineae | Anaerolineales | Anaerolinaceae | 0.009 | ** |
|  | Verrucomicrobia | Pedosphaerae | Pedosphaerales | R4.31B | 0.043 | * |
|  | Proteobacteria | Alphaproteobacteria | Rhizobiales | Bradyrhizobiaceae | 0.026 | * |
|  | Gemmatimonadetes | Gemmatimonadetes | Gemmatimonadales | A1.B1 | 0.046 | * |
|  | Bacteriodetes | Sphingobacteriia | Sphingobacteriales | Sphingobacteriaceae | 0.043 | * |
